# Supplementary material for: OneG-Vali: a computational tool for detecting, estimating and validating cryptic intermediates of proteins under native conditions
Source: Royal Society of Chemistry journal article supplement (doi:10.1039/c4ra04642k), 2014-01-01
Supplement: c4ra04642k1.pdf [file c4ra04642k1.pdf]

## Electronic Supplementary Information

### **OneG-Vali: A Computational tool for Detecting, Estimating and Validating Cryptic Intermediates of Proteins under Native Conditions**

Tambi Richa and Thirunavukkarasu Sivaraman\*

*Structural Biology Laboratory, Department of Bioinformatics, School of Chemical and Biotechnology, SASTRA University, Thanjavur – 613 401, TN, India.*

*E-mail : [sivaram@scbt.sastra.edu](mailto:sivaram@scbt.sastra.edu); Phone : +91 4362 264101 Ext. 2319*

*Fax : +91 4362 264120*

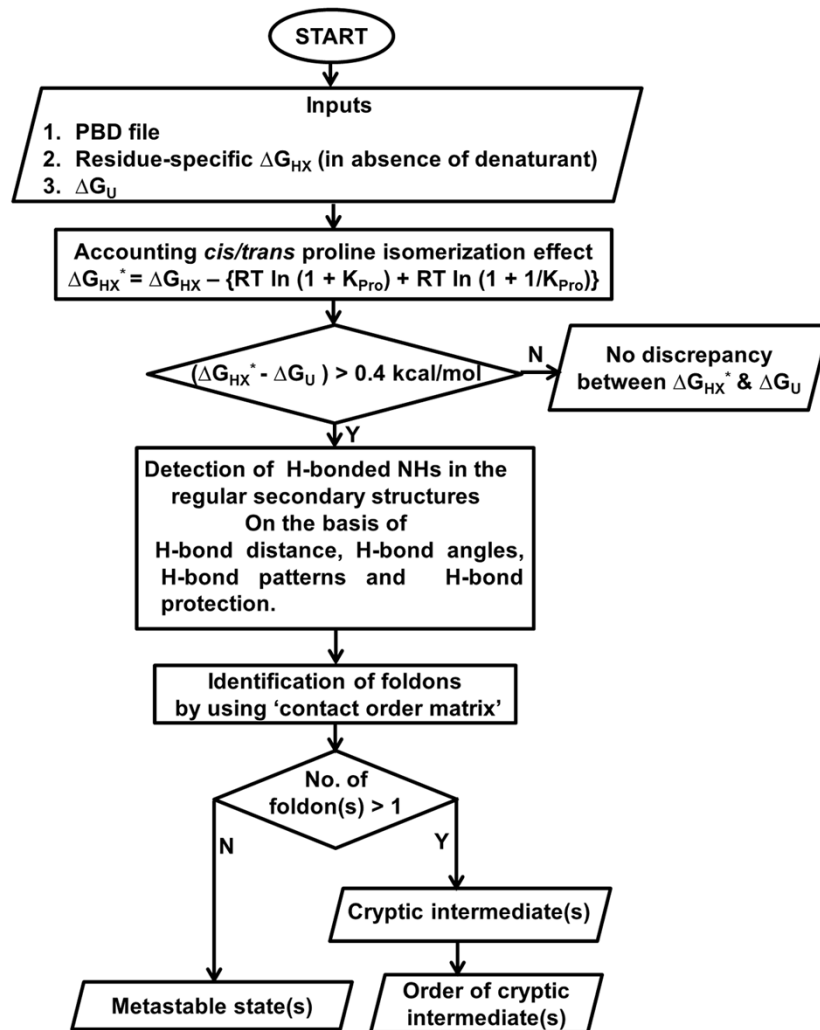

**Supplementary Fig. S1:** Workflow diagram of OneG. Flowchart outlines key-steps of the OneG used to predict cryptic intermediates/metastable states of proteins under native conditions.

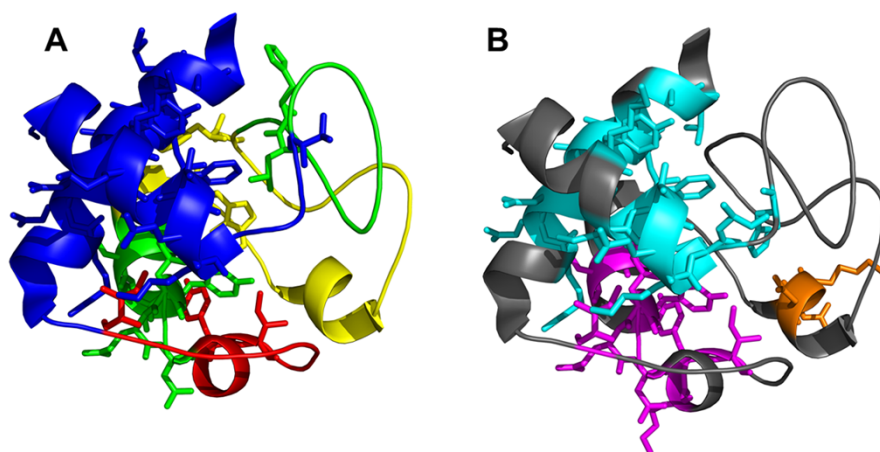

**Supplementary Fig. S2:** Figurative representations of various foldons in cytochrome c unfolding. The backbone structures of the protein and residues (for which exchange kinetics were observed by NS H/D exchange) representing each foldon are shown in ribbon and stick models, respectively (refer to Table 1). Figure S2A shows foldons detected by the NS H/D exchange method in blue (GUU), green (CI1), yellow (CI2) and red (CI3) colours. Figure S2B shows foldons predicted by the OneG-Vali tool in cyan (GUU), magenta (CI1) and orange (CI2) colours. Each CI is represented by residues defining its respective isotherm (refer to 'Methods').

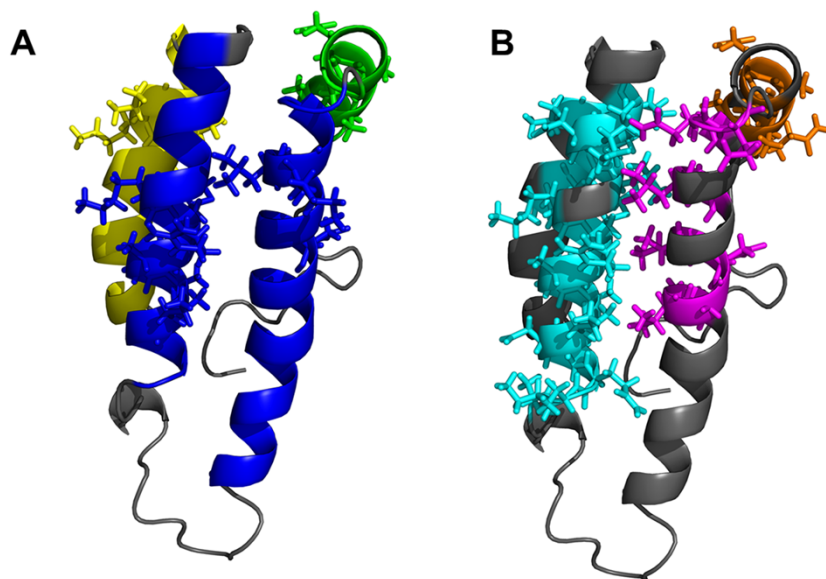

**Supplementary Fig. S3:** Figurative representations of various foldons in apocytochrome b<sub>562</sub> unfolding. The backbone structures of the protein and residues (for which exchange kinetics were observed by NS H/D exchange) representing each foldon are shown in ribbon and stick models, respectively (refer to Table 1). Figure S3A shows foldons detected by the NS H/D exchange method in blue (GUU), green (CI1) and yellow (CI2) colours. Figure S3B shows foldons predicted by the OneG-Vali tool in cyan (GUU), magenta (CI1) and orange (CI2) colours. Each CI is represented by residues defining its respective isotherm (refer to ‘Methods’).

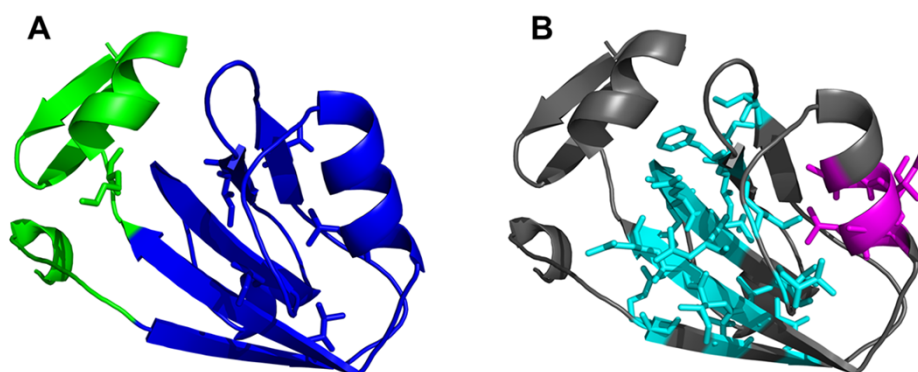

**Supplementary Fig. S4:** Figurative representations of various foldons in third domain of PDZ unfolding. The backbone structures of the protein and residues (for which exchange kinetics were observed by NS H/D exchange) representing each foldon are shown in ribbon and stick models, respectively (refer to Table 1). Figure S4A shows foldons detected by the NS H/D exchange method in blue (GUU) and green (CI1) colours. Figure S4B shows foldons predicted by the OneG-Vali tool in cyan (GUU) and magenta (CI1) colours. Each CI is represented by residues defining its respective isotherm (refer to 'Methods').

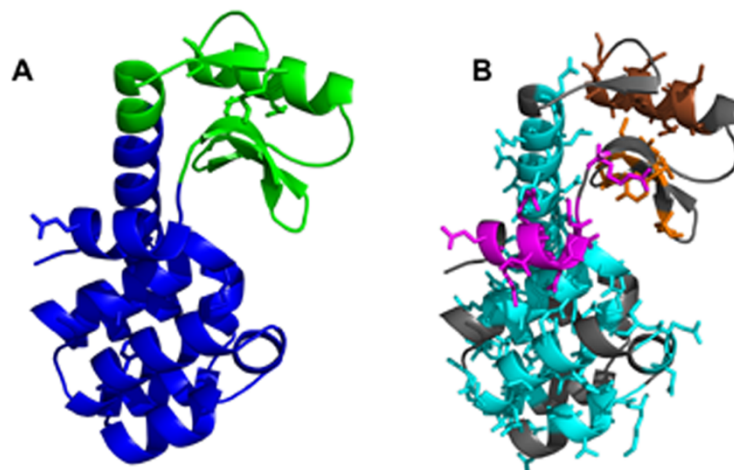

**Supplementary Fig. S5:** Figurative representations of various foldons in T4 Lysozyme unfolding. The backbone structures of the protein and residues (for which exchange kinetics were observed by NS H/D exchange) representing each foldon are shown in ribbon and stick models, respectively (refer to Table 1). Figure S5A shows foldons detected by the NS H/D exchange method in blue (GUU) and green (CI1) colours. Figure S5B shows foldons predicted by the OneG-Vali tool in cyan (GUU), magenta (CI1), orange (CI2) and brown (CI3) colours. Each CI is represented by residues defining its respective isotherm (refer to ‘Methods’).
